# Supplementary material for: Efficient Selection of Recombinant Fluorescent Vaccinia Virus Strains and Rapid Virus Titer Determination by Using a Multi-Well Plate Imaging System
Source: MDPI journal article supplement (doi:10.3390/biomedicines9081032), 2021-08-18
Supplement: s1 [file s1]

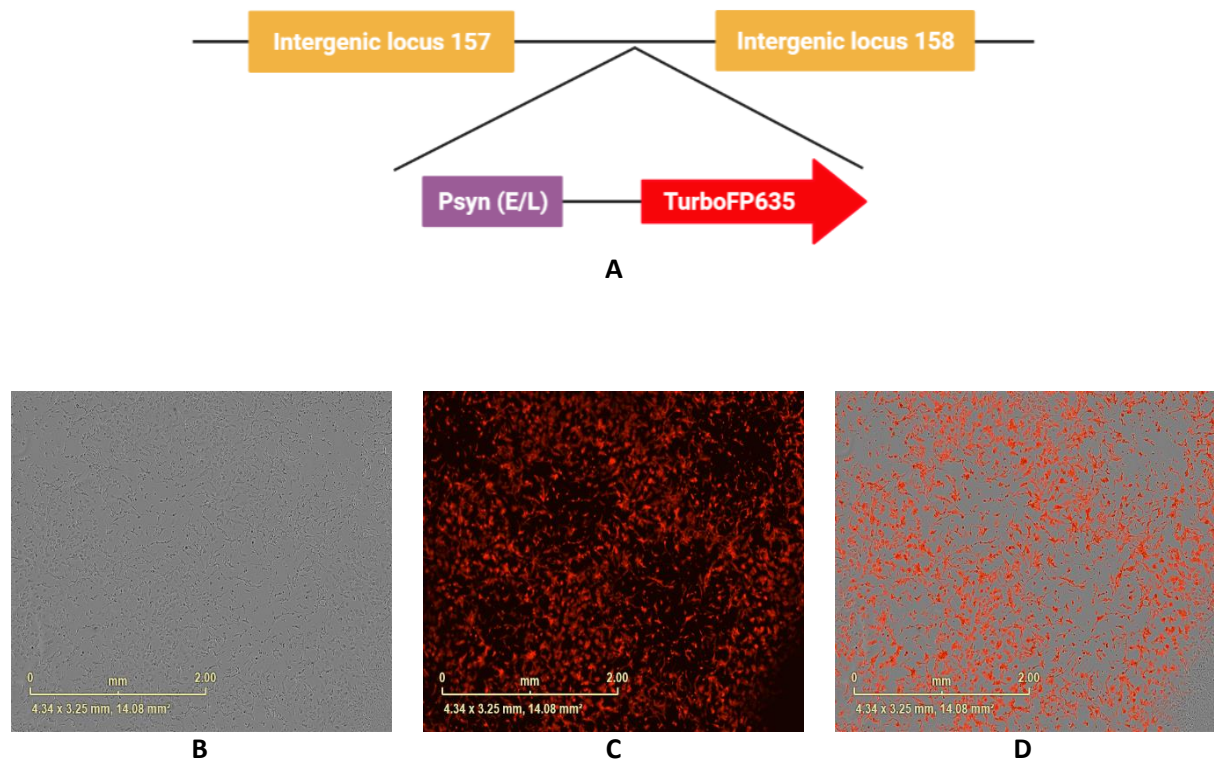

**Figure S1.** Recombinant vaccinia virus L1c-Ig-Turbo. (A) Schematic representation of recombinant vaccinia virus L1c-Ig-Turbo. (B) Bright field image of CV-1 cells infected with L1c-Ig-Turbo. (C) Fluorescence image of CV-1 cells infected with L1c-Ig-Turbo. (D) Overlap of fluorescence image with bright field image. Scale bars represent 2.0 mm.

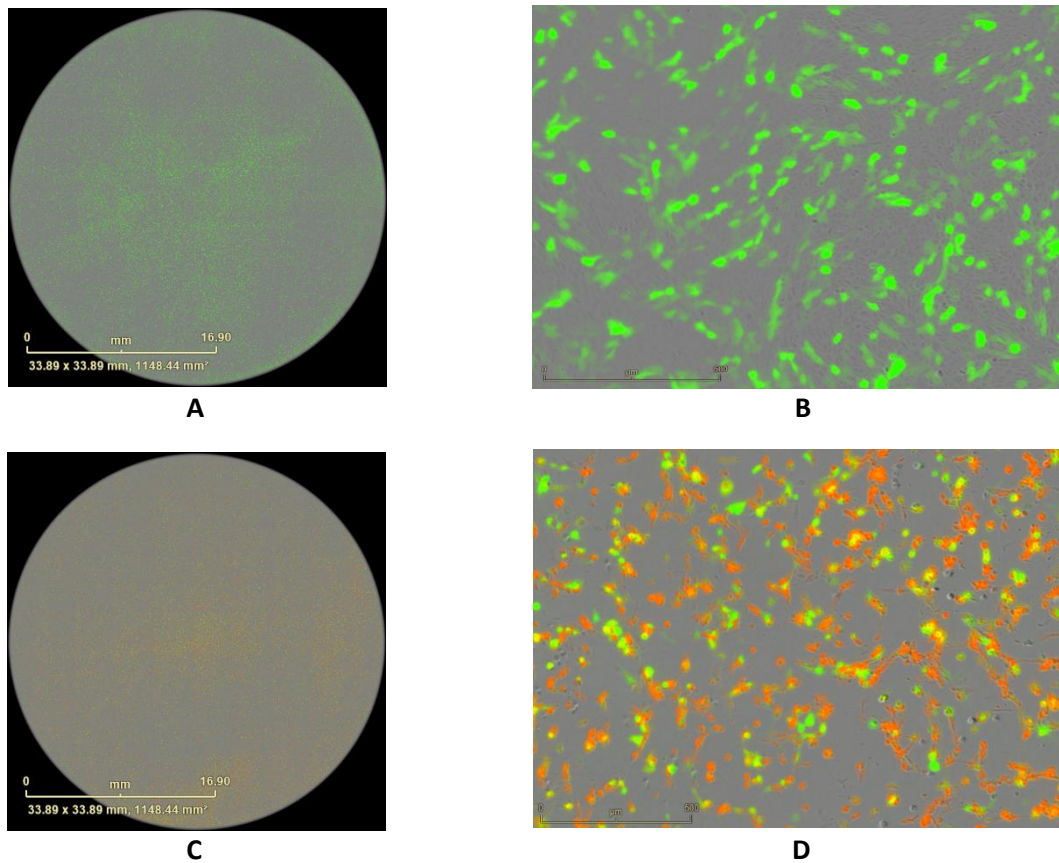

**Figure S2.** Identification of recombinant vaccinia virus L1c-Ig-Turbo-TK-eGFP by fluorescence image (A-D). (A) Fluorescence image of pEGFP-C2 transfection control well, scale bar=16.9 mm (B) Image enlargement (IE) from image (A), scale bar=500 μm. (C) Homologous recombination between the transfected PSG-eGFP plasmid and the vaccinia virus L1c-Ig-Turbo genome after two days of incubation, overlap of fluorescence image with bright field image, scale bar=16.9 mm (D) IE from image (C), scale bar represents 500 μm.

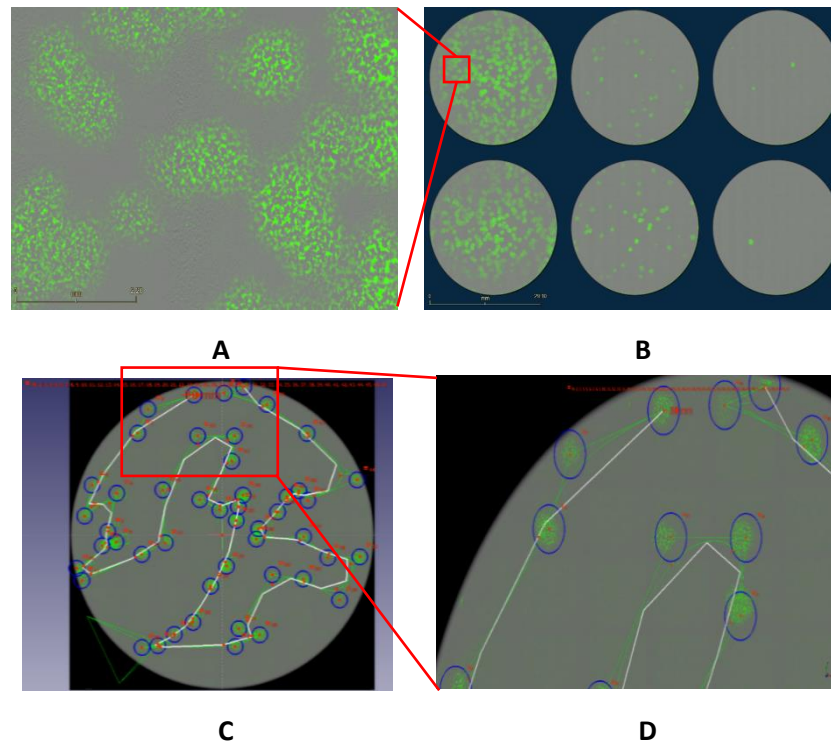

**Figure S3.** eGFP labelled rVACV plaque assay based on wild type CV-1 cells. Recombinant vaccinia virus GLV-1h109 infected wild type CV-1 cells in 6-well plate (**A-B**). (**A**) IE from (**B**) A1 well, scale bar= 2.2mm. (**B**) GLV-1h109 infected wild type CV-1 cells, scale bar=29.1mm. eGFP labelled viral plaques counted through FreeCAD software (**C-D**). (**C**) Viral plaques counting with GLV-1h109 infected wild type CV-1 cells through FreeCAD software. (**D**) IE from (**C**).

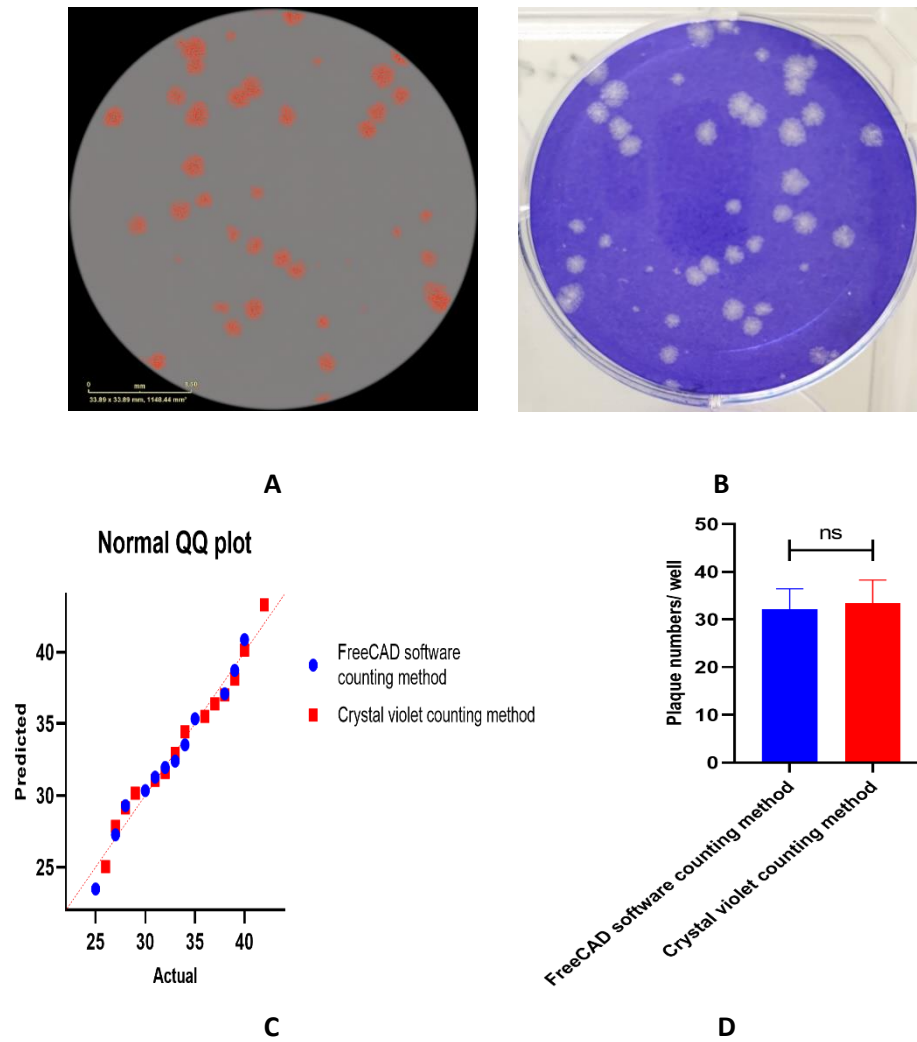

**Figure S4.** Crystal violet-stained manual counting vs. fluorescence-dependent FreeCAD plaque counting (**A-D**). (**A**) Viral plaques with L1c-Ig-Turbo-infected CV-1 cell line scanned by Incucyte®S3. (**B**) Crystal violet stain of (**A**). (**C**) Q-Q plot of FreeCAD software and crystal violet counting method. (**D**) Statistical comparison of FreeCAD software and crystal violet counting method (n=28), ns: not significant, P= 0.3479.



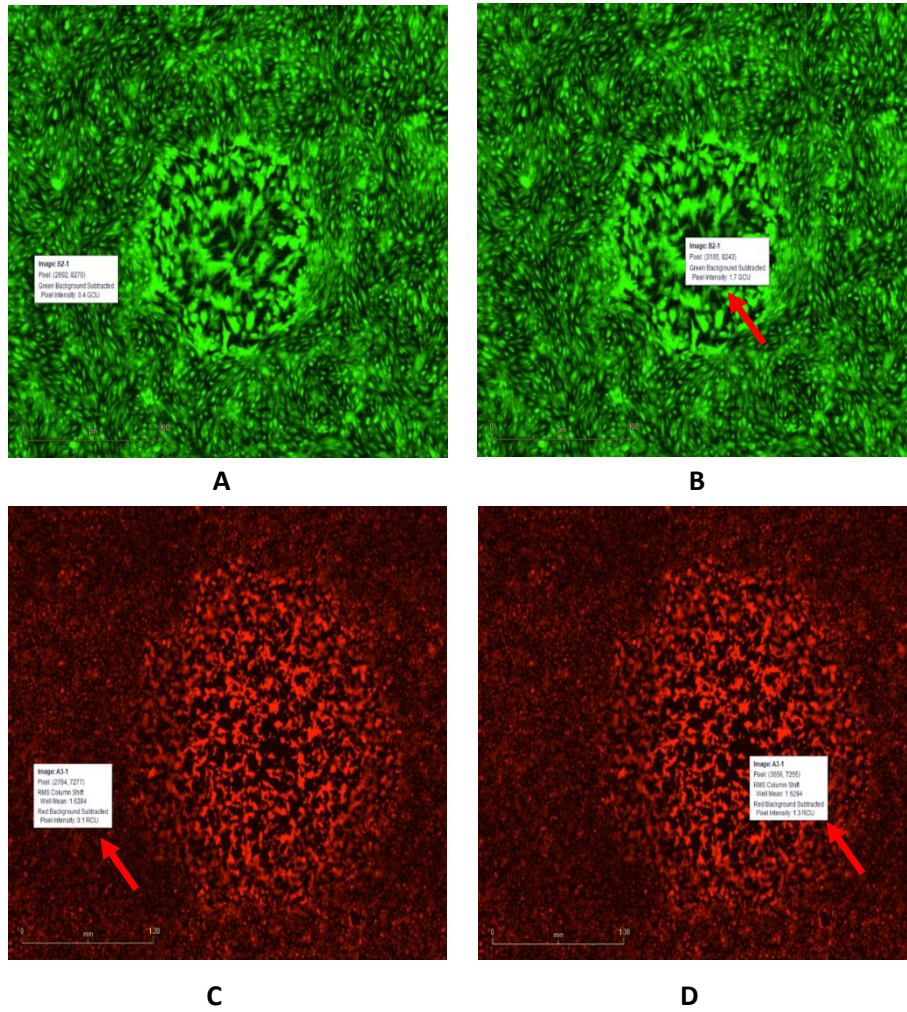

**Figure S5.** Pixel Intensity of Lister 1.1.1 infected fluorescence labelled stable CV-1 cells. **(A-B)** Lister 1.1.1 infected eGFP labelled stable CV-1 cells. **(C-D)** Lister 1.1.1 infected turboFP635 labelled stable CV-1 cells. **(A)** Green Background Subtracted Pixel Intensity of VACV uninfected cells: 0.4 GCU **(B)** Green Background Subtracted Pixel Intensity of VACV infected cells: 1.7 GCU. **(C):** Red Background Subtracted Pixel Intensity of VACV uninfected cells: 0.1 RCU. **(D):** Red Background Subtracted Pixel Intensity of VACV infected cells: 1.3 RCU.

**Table S1.** Recipe of virus dilution

| Dilutions          | Recipe                              |                         |
|--------------------|-------------------------------------|-------------------------|
| $10^{-2}$ dilution | 5 $\mu$ l from virus stock          | 495 $\mu$ l DMEM-5% FBS |
| $10^{-3}$ dilution | 100 $\mu$ l from dilution $10^{-2}$ | 900 $\mu$ l DMEM-5% FBS |
| $10^{-4}$ dilution | 100 $\mu$ l from dilution $10^{-3}$ | 900 $\mu$ l DMEM-5% FBS |
| $10^{-5}$ dilution | 100 $\mu$ l from dilution $10^{-4}$ | 900 $\mu$ l DMEM-5% FBS |
| $10^{-6}$ dilution | 100 $\mu$ l from dilution $10^{-5}$ | 900 $\mu$ l DMEM-5% FBS |
| $10^{-7}$ dilution | 100 $\mu$ l from dilution $10^{-6}$ | 900 $\mu$ l DMEM-5% FBS |
| $10^{-8}$ dilution | 100 $\mu$ l from dilution $10^{-7}$ | 900 $\mu$ l DMEM-5% FBS |
